# Supplementary material for: Activated interiors of clay nanotubes for agglomeration-tolerant automotive exhaust remediation
Source: Royal Society of Chemistry journal article supplement (doi:10.1039/c4ta06966h), 2015-01-01
Supplement: c4ta06966h1.pdf [file c4ta06966h1.pdf]

# Supporting Information

## **Activated Interior of Clay Nanotubes for Agglomeration-tolerant Catalysis**

**Noelia M. Sanchez-Ballester,<sup>\*a</sup> Gubbala V. Ramesh,<sup>a</sup> Toyokazu Tanabe,<sup>b</sup> Eva Koudelkova,<sup>c</sup> Jia Liu,<sup>a</sup> Lok Kumar Shrestha,<sup>a</sup> Yuri Lvov,<sup>d</sup> Jonathan Hill,<sup>a</sup> Katsuhiko Ariga<sup>\*ae</sup> and Hideki Abe<sup>\*ae</sup>**

<sup>a</sup>International Center for Materials Nanoarchitectonics (MANA), National Institute for Materials Science (NIMS), 1-1 Namiki, Ibaraki Tsukuba, 305-0044 Japan.

<sup>b</sup>Kanagawa University, 3-27 Rokkakubashi, Yokohama, Kanagawa 221-8686, Japan

<sup>c</sup>Department of Physical Chemistry, Faculty of Chemical Technology, University of Pardubice, Studentská 573, CZ532 10 Pardubice, Czech Republic.

<sup>d</sup>Institute of Micromanufacturing, Louisiana Tech University, 911 Hergot Avenue, Ruston, Louisiana 71272, United States.

<sup>e</sup>Precursory Research for Embryonic Science and Technology (PRESTO) and Core Research for Evolutional Science and Technology (CREST), Japan Science and Technology Agency (JST), 4-1-8 Honcho, Kawaguchi, Saitama 332-0012, Japan.

### **\*Corresponding author: E-Mail:**

ABE.Hideki@nims.go.jp,

SANCHEZBALLESTER.Noelia@nims.go.jp,

[ARIGA.Katsuhiko@nims.go.jp](mailto:ARIGA.Katsuhiko@nims.go.jp)

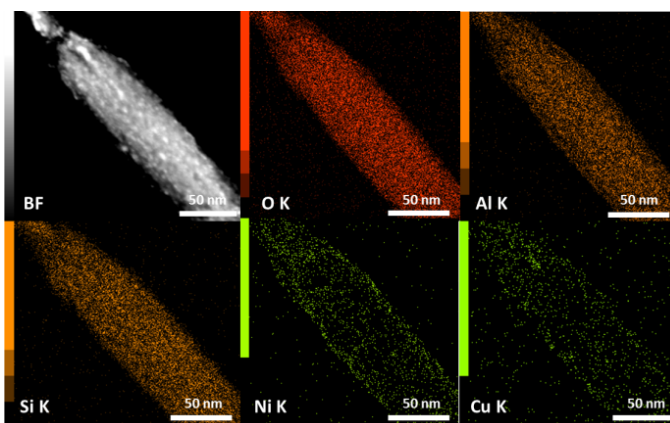

**Figure S1.** EDX mapping images for the Cu-Ni nanoparticles decorating the Halloysite nanotubes surface.

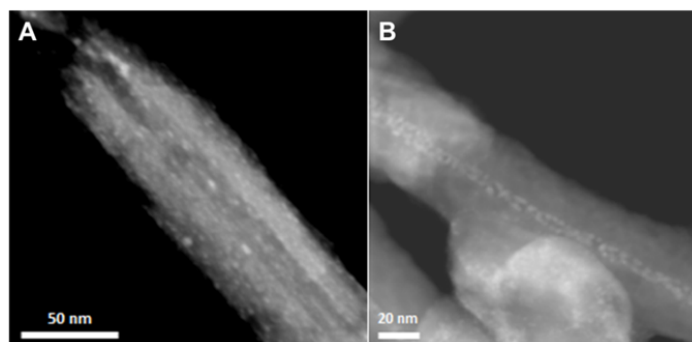

**Figure S2.** HAADF images of (A) Cu-Ni/Halloysite and (B) Cu-Ni@Halloysite materials.

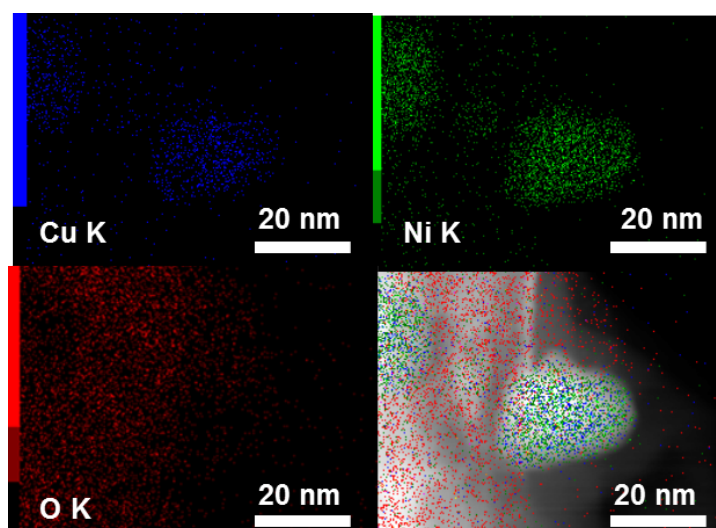

**Figure S3.** EDX mapping images of an individual Cu-Ni alloy nanoparticle.

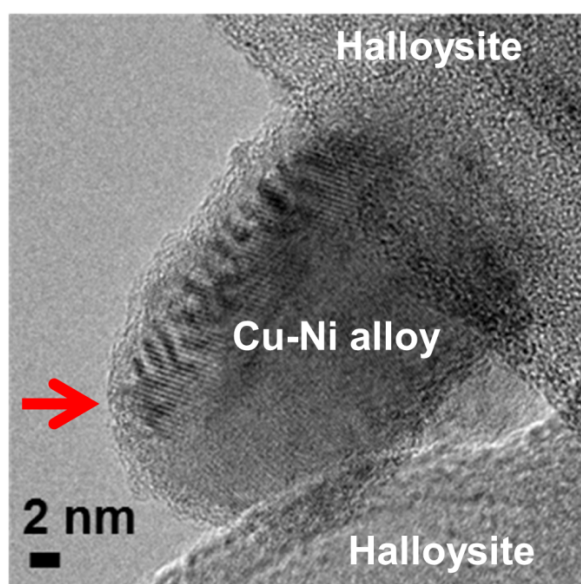

**Figure S4.** High-resolution TEM image of an individual Cu-Ni alloy nanoparticle. Cu-Ni alloy surface is exposed to the atmosphere at the point indicated by an red arrow.

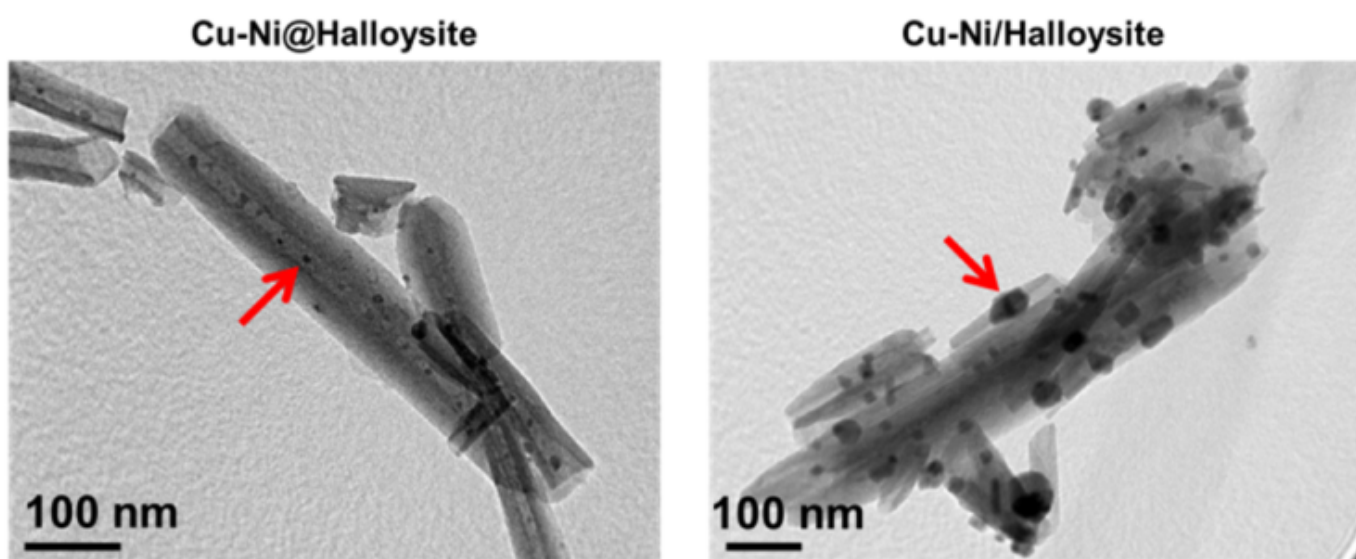

**Figure S5.** TEM images of the catalysts after the repeated NO remediation catalysis. Red arrows correspond to the Cu-Ni nanoparticles.

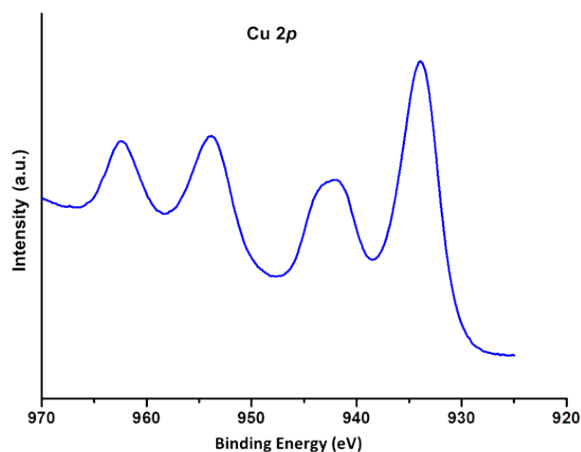

**Figure S6.** XPS profile of CuO reference nanoparticles.

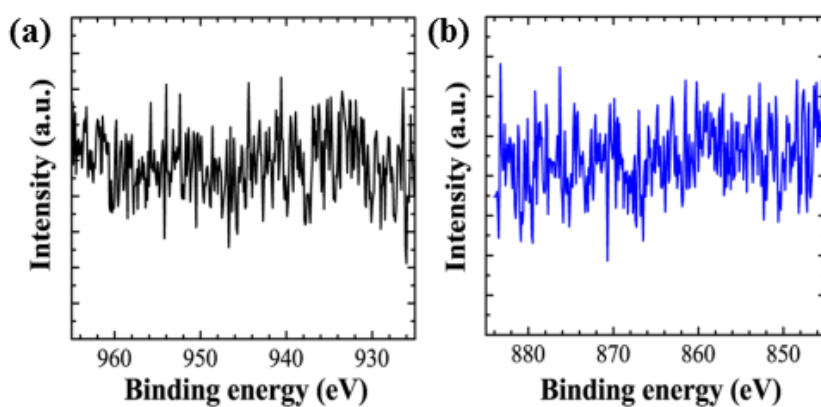

**Figure S7.** XPS spectra for the Cu-Ni@Haloysite in the Cu 2p region (a) and in the Ni 2p region (b).

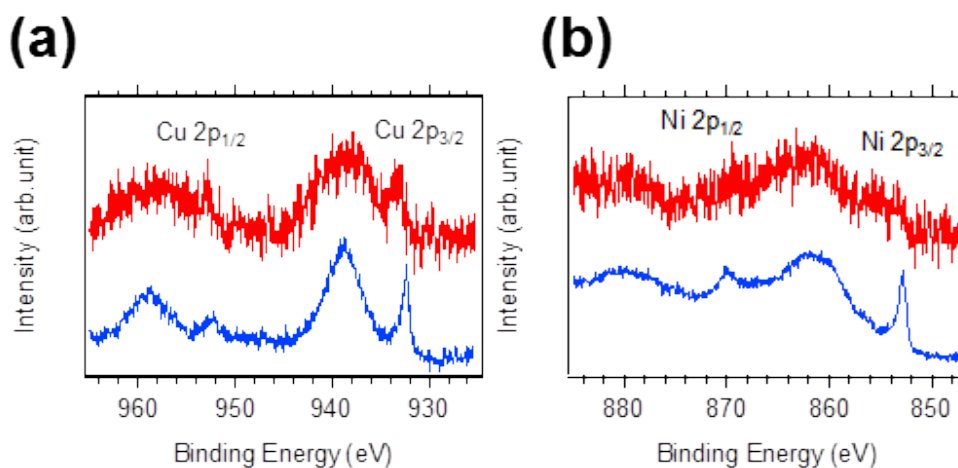

**Figure S8.** (a) HAXPES spectra in the Cu 2p region for the Cu-Ni@Haloysite (red) and the Cu-Ni/Haloysite (blue). (b) HAXPES spectra in the Ni 2p region for the Cu-Ni@Haloysite (red) and the Cu-Ni/Haloysite (blue).

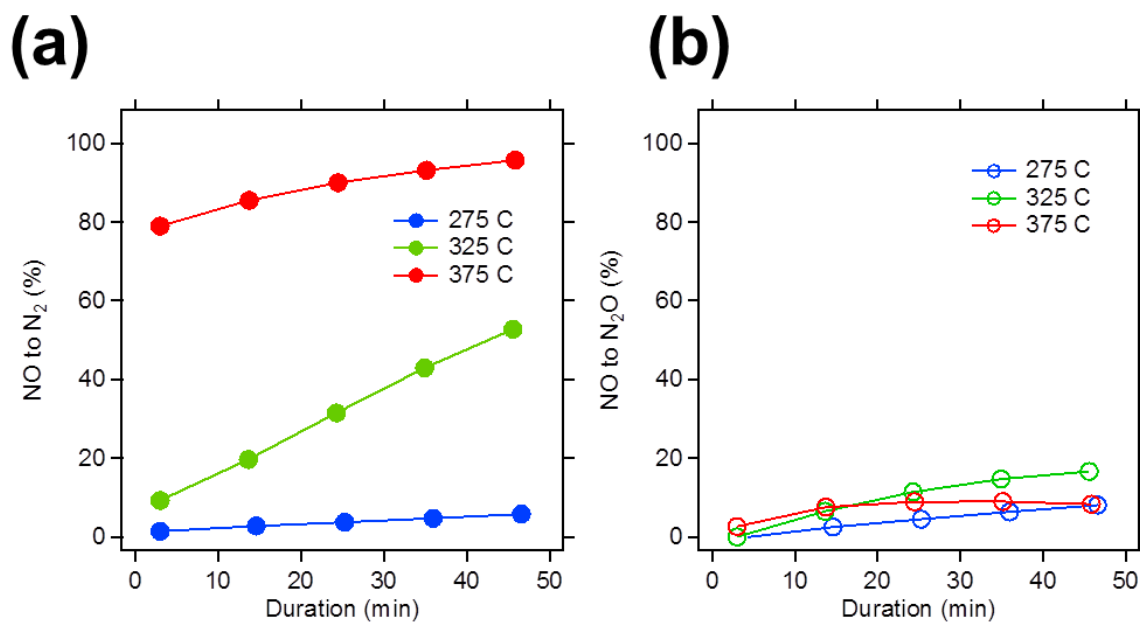

**Figure S9.** Reaction selectivity of the Cu-Ni@Haloysite to the different reaction paths: (a) NO to N<sub>2</sub> conversion and (b) NO to N<sub>2</sub>O conversion.

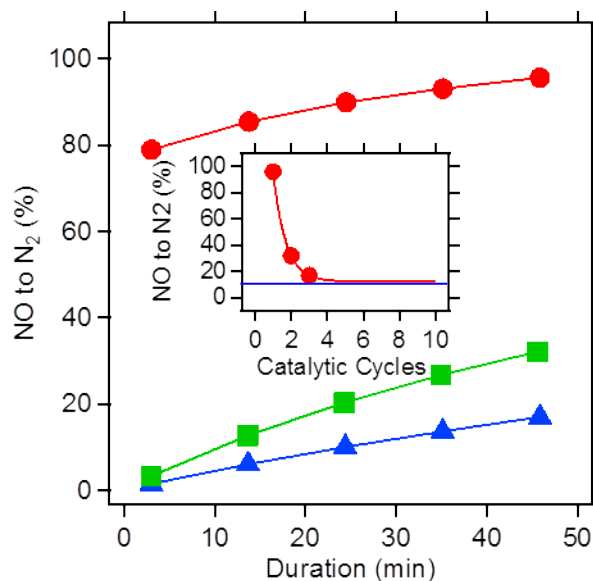

**Figure S10.** Time courses for the NO remediation (NO to N<sub>2</sub> conversion) through repeated catalysis. The red, green and blue profiles correspond to the 1<sup>st</sup>, 2<sup>nd</sup> and 3<sup>rd</sup> cycles at a reaction temperature of 375 °C. The inset shows the NO-to-N<sub>2</sub> conversion rate at duration time = 45 min as function of catalytic cycles, together with an exponential fitting to the experimental data.

### NO remediation catalysis.

The possible reaction paths for the NO remediation are:

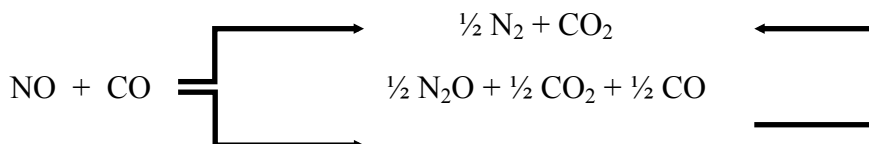

The initial number of the NO and CO molecules in the circulating reactor,  $N$  (constant), is given by

$$N = N_C = N_N = \frac{1}{2} N_O \quad (1)$$

where  $N_C$ ,  $N_N$  and  $N_O$  denote the number of carbon, nitrogen and oxygen atoms involved in the reaction, respectively.

The numbers of the atoms are always retained in the circulating condition:

$$N_C = N_{\text{CO}} + N_{\text{CO}_2} \quad (2)$$

$$N_N = 2N_{\text{N}_2\text{O}} + 2N_{\text{N}_2} + N_{\text{NO}} \quad (3)$$

$$N_O = N_{\text{CO}} + 2N_{\text{CO}_2} + N_{\text{NO}} + N_{\text{N}_2\text{O}} \quad (4)$$

where  $N_{\text{CO}}$ ,  $N_{\text{CO}_2}$ ,  $N_{\text{N}_2\text{O}}$ ,  $N_{\text{N}_2}$  and  $N_{\text{NO}}$  correspond to the number of CO, CO<sub>2</sub>, N<sub>2</sub>O, N<sub>2</sub> and NO, respectively, in a given volume of the circulating reactor.

From the equations (1), (2), (3) and (4) we obtain

$$N_{\text{CO}} = N - N_{\text{CO}_2} \quad (5)$$

$$N_{\text{NO}} = N - N_{\text{N}_2\text{O}} - N_{\text{CO}_2} \quad (6)$$

$$N_{\text{N}_2} = \frac{1}{2} N_{\text{CO}_2} - \frac{1}{2} N_{\text{N}_2\text{O}} \quad (7)$$

The number of the gas molecules in a given volume of the reactor is proportional to the peak area of the corresponding output signal from the gas chromatograph,  $A_{\text{gas}}$ :

$$CA_{\text{gas}} = S_{\text{gas}}N_{\text{gas}} \quad (8)$$

( $C = V/RT$ ;  $R$  = gas constant,  $T = 300$  (K),  $V$  = volume of the circulating reactor)

Here the proportionality constant,  $S_{\text{gas}}$ , was determined as the ratio between the known pressure of the gas and the corresponding peak area:

$S_{\text{CO}}$  - ratio of the peak area to the partial pressure of CO = 0.22847 kPa<sup>-1</sup>

$S_{\text{NO}}$  - ratio of the peak area to the partial pressure of NO = 0.21674 kPa<sup>-1</sup>

$S_{\text{CO}_2}$  - ratio of the peak area to the partial pressure of CO<sub>2</sub> = 0.26502 kPa<sup>-1</sup>

$S_{\text{N}_2\text{O}}$  - ratio of the peak area to the partial pressure of N<sub>2</sub>O = 0.24063 kPa<sup>-1</sup>

$S_{\text{N}_2}$  - ratio of the peak area to the partial pressure of N<sub>2</sub> = 0.22516 kPa<sup>-1</sup>

The output signals from the GC were integrated to obtain the peak area. As given in Chart S1, the area for the first signal,  $\Delta_1$ , corresponded to a mixture of NO, CO and N<sub>2</sub> gases. The second- and third signals,  $\Delta_2$  and  $\Delta_3$ , corresponded to CO<sub>2</sub> and N<sub>2</sub>O, respectively.

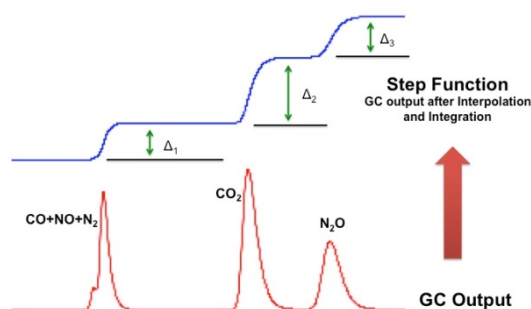

**Chart S1.** Gas Chromatograph output signal for NO remediation reaction and its corresponding step function graph.

By using equation (5), (6), (7) and (8) we obtain

$$C \Delta_1 = S_{\text{CO}}N_{\text{CO}} + S_{\text{NO}}N_{\text{NO}} + S_{\text{N}_2}N_{\text{N}_2} \quad (9)$$

$$C \Delta_2 = S_{\text{CO}_2}N_{\text{CO}_2} \quad (10)$$

$$C \Delta_3 = S_{\text{N}_2\text{O}}N_{\text{N}_2\text{O}} \quad (11)$$

Combining (6), (7), (10) and (11), we obtain

$$N_{\text{CO}_2} = C \Delta_2 / S_{\text{CO}_2} \quad (13)$$

$$N_{\text{N}_2\text{O}} = C \Delta_3 / S_{\text{N}_2\text{O}} \quad (14)$$

$$N_{\text{N}_2} = C (\frac{1}{2}\Delta_2 / S_{\text{CO}_2} - \frac{1}{2}\Delta_3 / S_{\text{N}_2\text{O}}) \quad (15)$$

From (5) and (9) we obtain

$$N = \{C / (S_{\text{CO}} + S_{\text{NO}})\} \{ \Delta_1 + (S_{\text{CO}} + S_{\text{NO}} - \frac{1}{2} S_{\text{N}_2}) (\Delta_2 / S_{\text{CO}_2}) + (S_{\text{NO}} + \frac{1}{2} S_{\text{N}_2}) (\Delta_3 / S_{\text{N}_2\text{O}}) \} \quad (16)$$

The remediation rates of NO to N<sub>2</sub>O and N<sub>2</sub> were finally calculated as 2N<sub>N<sub>2</sub>O</sub>/N ((14) & (16)) and 2N<sub>N<sub>2</sub></sub>/N ((15) & (16)), respectively.
